# Supplementary material for: Exploiting a Phage-Bacterium Interaction System as a Molecular Switch to Decipher Macromolecular Interactions in the Living Cell
Source: MDPI journal article supplement (doi:10.3390/v10040168), 2018-04-01
Supplement: s1 [file s1]

Supplementary Materials to accompany the manuscript:

## Exploiting a phage-bacterium interaction system as a molecular switch to decipher macromolecular interactions in the living cell

Éva Viola Surányi <sup>1,2,†,\*</sup>, Rita Hirmondó <sup>2,†,\*</sup>, Kinga Nyíri <sup>1,2</sup>, Szilvia Tarjányi <sup>2</sup>, Bianka Kőhegyi <sup>1,2</sup>, Judit Tóth <sup>2</sup> and Beáta G. Vértessy <sup>1,2,\*</sup>

<sup>1</sup> Department of Applied Biotechnology and Food Sciences, Budapest University of Technology and Economics, Budapest, H-1111, Hungary

<sup>2</sup> Institute of Enzymology, RCNS, Hungarian Academy of Sciences, Budapest, H-1117, Hungary

† These authors contributed equally to this work as first authors

\* Correspondence: vertessy@mail.bme.hu, vertessy.beata@ttk.mta.hu; Tel.: +36 13 826 707, eva.suranyi@mail.bme.hu; Tel.: +36 13 826 729, hirmondo.rita@ttk.mta.hu; Tel.: +36 13 826 729

## SUPPLEMENTARY MATERIALS

**Supplementary Table S1.** Stl mutants identified with reduced DNA binding ability in the Stl switch system

| Number of mutations | Stl mutants                             |
|---------------------|-----------------------------------------|
| 1 mutation          | Stl <sup>K19K</sup>                     |
|                     | Stl <sup>E59K</sup>                     |
|                     | Stl <sup>G62Afs*88</sup>                |
|                     | Stl <sup>G66Afs*88</sup>                |
|                     | Stl <sup>I123T</sup>                    |
|                     | Stl <sup>Y143Y</sup>                    |
|                     | Stl <sup>V144A</sup>                    |
|                     | Stl <sup>R177H</sup>                    |
|                     | Stl <sup>K214*</sup>                    |
|                     | Stl <sup>A236T</sup>                    |
|                     | Stl <sup>K238E</sup>                    |
| 2 mutations         | Stl <sup>Q6H, S76T</sup>                |
|                     | Stl <sup>G15S, K240R</sup>              |
|                     | Stl <sup>T16S, D142A</sup>              |
|                     | Stl <sup>G92D, V229M</sup>              |
|                     | Stl <sup>I134V, H256R</sup>             |
|                     | Stl <sup>K158N, I220V</sup>             |
| 3 mutations         | Stl <sup>D174V, G185G, K193K</sup>      |
| 4 mutations         | Stl <sup>I18T, Y98H, D142D, R227C</sup> |

|              |                                                                                      |
|--------------|--------------------------------------------------------------------------------------|
|              | Stl <sup>V55M, F79L, N137D, I161T</sup>                                              |
| 5 mutations  | Stl <sup>Y70C, K80K, K93R, L152R, I181Lfs*188</sup>                                  |
| 6 mutations  | Stl <sup>M1R<sup>a</sup>, G54V, L129P, D140E, E186V, H188H</sup>                     |
|              | Stl <sup>I17V, F38S, L72P, G92S, D95G, D108N</sup>                                   |
|              | Stl <sup>N41D, E186V, R227R, D235D, K240R, K244E</sup>                               |
| 7 mutations  | Stl <sup>I17T, S76S, G92A, I212T, L222P, R227R, I237I</sup>                          |
| 8 mutations  | Stl <sup>S30G, Y84H, I134A, Y143H, N168S, L194L, E224E, Q257Q</sup>                  |
| 10 mutations | Stl <sup>F38L, H46Y, N48S, I58T, L65P, P86Q, Y112H, S114N, N135I, N203S</sup>        |
| 11 mutations | Stl <sup>K31N, I53I, K63K, I67I, R74H, K93K, D155D, K193E, T197A, L245P, Y246*</sup> |

<sup>a</sup>pKW08-Stl vector is containing an AU-tag before the coding sequence of Stl (Hirmondó et al. 2015, DNA Repair), therefore a protein may be translated from this mutant despite the first Met is mutated

**Supplementary Table S2. Oligonucleotides used in the present study**

Restriction sites are underlined

| Used in                                                                                                           | Oligo name           | 5'-3' sequence                                                                                                                                                                                                                                                |
|-------------------------------------------------------------------------------------------------------------------|----------------------|---------------------------------------------------------------------------------------------------------------------------------------------------------------------------------------------------------------------------------------------------------------|
| Cloning of p2NIL-LacZ <sup>Str</sup> -INT plasmid                                                                 | Sall_str             | TTT <u>TAGTCGAC</u> CATATTCTCACCTCCTCGAAC                                                                                                                                                                                                                     |
|                                                                                                                   | HindIII_str          | TGTGT <u>AAGCTT</u> CATATTCTCACCTCCTCGAAC                                                                                                                                                                                                                     |
|                                                                                                                   | BglII_LacZ           | TGTGT <u>AGATCT</u> GTCGTTGTGGTCACTCG                                                                                                                                                                                                                         |
|                                                                                                                   | Sall_LacZ            | TATAT <u>GTCGAC</u> CGCCCAAACATGCATGGAT                                                                                                                                                                                                                       |
|                                                                                                                   | NotI_INT_for         | ATATAG <u>CGGCGC</u> GCTGCTCCATAACATCAAACATC                                                                                                                                                                                                                  |
|                                                                                                                   | NotI_INT_rev         | ATATAG <u>CGGCGC</u> GGAAGCTTGCATGCCTGC                                                                                                                                                                                                                       |
| Cloning of pKW08-Stl <sup>C-term</sup>                                                                            | Stl-Cterm_Au_BamHI_f | ATTAGGATCCATGGATACGTATCGCTACATAAGCCCGACCCTGAACG                                                                                                                                                                                                               |
|                                                                                                                   | Stl_HindIII_r        | ATTA <u>AAAGCTT</u> GCGGCCGCTTAGTTGGTATC                                                                                                                                                                                                                      |
| Error prone PCR, Cloning of pKW08-Stl <sup>A236T</sup> and pKW08-Stl <sup>MUT</sup> , and pKW08-Stl <sup>AA</sup> | Stl_Au_BamHI_f       | AATTAGGATCCATGGATACGTATCGCTACATAGCTAGCC                                                                                                                                                                                                                       |
|                                                                                                                   | Stl_HindIII_r        | ATTA <u>AAAGCTT</u> GCGGCCGCTTAGTTGGTATC                                                                                                                                                                                                                      |
| Colony PCR for sequencing                                                                                         | Stl_seq_f            | GGTGGTGAGTCATAGTTGC                                                                                                                                                                                                                                           |
|                                                                                                                   | Stl_seq_r            | CGCTTAATCCAAAGTTCAAACG                                                                                                                                                                                                                                        |
| EMSA                                                                                                              | Stl-Str              | TCGTAAACATATTCTCACCTCCTCGAACAAATTATCTCACATCGAGATATTTATTTCAACATTA<br>AATATTGCAAATTGAGATATTTTTTCGATATGATATCATTTGGATGGAAGGAGCTGGTCAAA<br>TGGCAGAATTACCAACACATTACGGCACAATTATTA <sup>AA</sup> ACTCTTAGAAAATACATGAAATTAA<br>CTCAAAGCAAATTGAGTGAAAGGACAGGATTTAGGATCC |

**Supplementary Table S3. Plasmids used in the present study**

| Plasmid name                   | Characteristics                                                             | Antibiotic Resistance | Reference             |
|--------------------------------|-----------------------------------------------------------------------------|-----------------------|-----------------------|
| p2NIL-LacZ <sup>Str</sup> -INT | reporter plasmid; LacZ; L5 integration cassette                             | Kan <sup>R</sup>      | this study            |
| pKW08-Stl                      | expression of Stl in Mycobacterium; Tet-inducible                           | Hyg <sup>R</sup>      | Hirmondo et al., 2015 |
| pKW08-Stl <sup>C-term</sup>    | expression of C-terminal part of Stl in Mycobacterium; Tet-inducible        | Hyg <sup>R</sup>      | this study            |
| pKW08-Stl <sup>AA</sup>        | expression of AA mutant Stl in Mycobacterium; Tet-inducible                 | Hyg <sup>R</sup>      | this study            |
| pKW08-Stl <sup>MUT</sup>       | expression of random mutagenized Stl in Mycobacterium; Tet-inducible        | Hyg <sup>R</sup>      | this study            |
| pKW08-Stl <sup>A236T</sup>     | expression of A236T mutant Stl in Mycobacterium; Tet-inducible              | Hyg <sup>R</sup>      | this study            |
| pGex-4T-1-Stl                  | protein expression of Stl, Gluthation-S-transferase tag                     | CA <sup>R</sup>       | Nyiri et al., 2015    |
| pGex-4T-1-Stl <sup>A236T</sup> | protein expression of A236T mutant Stl, Gluthation-S-transferase tag        | CA <sup>R</sup>       | this study            |
| pSJ27- $\phi$ dut              | expression of $\phi$ 11 dUTPase in Mycobacterium; Bxb1 integration cassette | Cm <sup>R</sup>       | this study            |
